# Supplementary material
Source: Springer Nature journal article supplement (https://www.springermedizin.de/resource/supplementary/13049_2009_45_MOESM2_ESM.pdf/9665764)

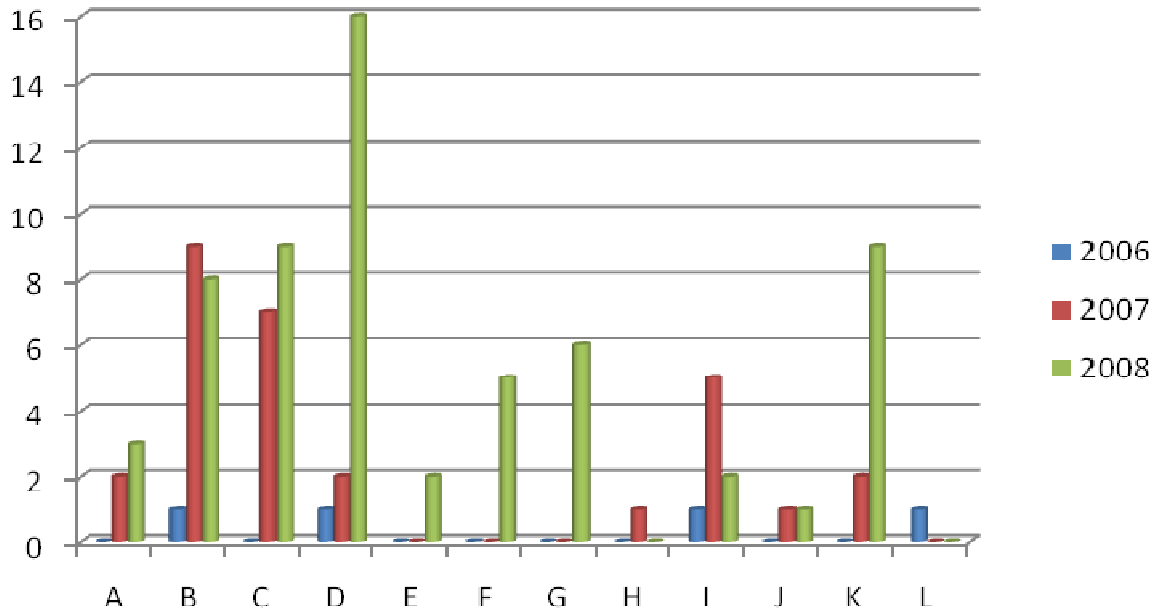

Supplement: MOESM2 [file 9665764]
